# Supplementary material for: Lower extremity electromyographic characteristics of patients with noncontact complete anterior cruciate ligament rupture not reconstructed in one-legged jump landings: a case-control study
Source: Research Square preprint supplement (doi:10.21203/rs.3.rs-6633756/v1), 2025-06-09
Supplement: Supplementary file 1 [file a9e1073aa55df94a7c475c63.docx]

Supplementary Table 1 Surface Electrode Acquisition Locations

| Testing Muscles | Acquisition Location |
| --- | --- |
| Vastus lateralis muscle | Inferior 1/3 of the line between the anterior superior iliac spine and the outer edge of the patella |
| Vastus medialis muscle | 20% below the line connecting the anterior superior iliac spine with the anterior joint space of the medial collateral ligament of the knee joint |
| Biceps femoris muscle | At the midpoint on the line between the sciatic tuberosity and the lateral epicondyle of the tibia |
| Semitendinosus muscle | Midpoint on the line between the sciatic tuberosity and the medial epicondyle of the tibia |
| Gluteus maximus muscle | 1/2 of the line connecting the sacrum and the greater trochanter of the femur, a position that corresponds to the greatest elevation of the midgluteal region, well above the visible elevation of the greater trochanter. |

Supplementary Table 2 The p-values for comparison of muscle RMS between groups

| muscles | Groups | Mean±SD | Groups | | p-value | muscles | Groups | Mean±SD | Groups | | p-value |
| --- | --- | --- | --- | --- | --- | --- | --- | --- | --- | --- | --- |
| VL  100ms before IC  peak value | A | 23.68±10.63 | A | B | 0.4152 | VL  100ms after IC  peak value | A | 49.33±18.62 | A | B | 0.4731 |
| B | 26.34±9.68 | A | C | 0.0701 | B | 54.24±17.89 | A | C | 0.0171 |
| C | 29.64±11.40 | A | D | 0.6083 | C | 65.92±25.84 | A | D | 0.1763 |
| D | 25.35±10.30 | B | C | 0.3125 | D | 58.62±24.76 | B | C | 0.0901 |
|  |  | B | D | 0.7615 |  |  | B | D | 0.5218 |
| C | D | 0.1903 | C | D | 0.2869 |
| Interaction | | | 0.1342 | Interaction | | | 0.2085 |
| Test limb | | | 0.7236 | Test limb | | | 0.8045 |
| Subject group | | | 0.2823 | Subject group | | | 0.0324 (F = 4.742) |
| VL  100ms before IC  average value | A | 15.73±6.38 | A | B | 0.9995 | VL  100ms after IC  average value | A | 35.93±13.74 | A | B | 0.5633 |
| B | 17.08±5.30 | A | C | 0.7628 | B | 39.04±12.72 | A | C | 0.1184 |
| C | 16.37±8.10 | A | D | 0.9327 | C | 44.39±20.10 | A | D | 0.1684 |
| D | 15.55±7.29 | B | C | 0.7633 | D | 43.38±21.25 | B | C | 0.3212 |
|  |  | B | D | 0.9322 |  |  | B | D | 0.4205 |
| C | D | 0.6994 | C | D | 0.8509 |
| Interaction | | | 0.7844 | Interaction | | | 0.5881 |
| Test limb | | | 0.7851 | Test limb | | | 0.7825 |
| Subject group | | | 0.8782 | Subject group | | | 0.0952 |
| VM  100ms before IC  peak value | A | 29.35±11.41 | A | B | 0.1960 | VM  100ms after IC  peak value | A | 44.75±19.73 | A | B | 0.0986 |
| B | 24.74±10.30 | A | C | 0.5924 | B | 57.20±20.63 | A | C | 0.0054 |
| C | 27.45±12.51 | A | D | 0.9190 | C | 66.04±27.90 | A | D | 0.0253 |
| D | 29.71±11.50 | B | C | 0.4457 | D | 61.73±27.16 | B | C | 0.2389 |
|  |  | B | D | 0.1636 |  |  | B | D | 0.5448 |
| C | D | 0.5243 | C | D | 0.5645 |
| Interaction | | | 0.1732 | Interaction | | | 0.1156 |
| Test limb | | | 0.6397 | Test limb | | | 0.4419 |
| Subject group | | | 0.5409 | Subject group | | | 0.0164 (F = 6.007) |
| VM  100ms before IC  average value | A | 15.42±5.76 | A | B | 0.2884 | VM  100ms after IC  average value | A | 35.43±14.98 | A | B | 0.7769 |
| B | 17.62±6.50 | A | C | 0.1747 | B | 37.04±15.91 | A | C | 0.0178 |
| C | 18.24±7.41 | A | D | 0.6668 | C | 49.14±21.86 | A | D | 0.1168 |
| D | 16.31±6.92 | B | C | 0.7645 | D | 44.41±19.81 | B | C | 0.0357 |
|  |  | B | D | 0.5262 |  |  | B | D | 0.1970 |
| C | D | 0.3515 | C | D | 0.4061 |
| Interaction | | | 0.1599 | Interaction | | | 0.4309 |
| Test limb | | | 0.9261 | Test limb | | | 0.6980 |
| Subject group | | | 0.6058 | Subject group | | | 0.0102 (F = 6.925) |
| BF  100ms before IC  peak value | A | 58.25±16.62 | A | B | 0.7423 | BF  100ms after IC  peak value | A | 27.26±10.76 | A | B | 0.2159 |
| B | 60.15±17.63 | A | C | 0.4114 | B | 31.44±9.95 | A | C | 0.7911 |
| C | 53.49±20.64 | A | D | 0.2255 | C | 26.37±12.03 | A | D | 0.5968 |
| D | 51.21±19.55 | B | C | 0.2512 | D | 29.04±10.57 | B | C | 0.1342 |
|  |  | B | D | 0.1247 |  |  | B | D | 0.4759 |
| C | D | 0.6933 | C | D | 0.4279 |
| Interaction | | | 0.6092 | Interaction | | | 0.7509 |
| Test limb | | | 0.9630 | Test limb | | | 0.1522 |
| Subject group | | | 0.0967 | Subject group | | | 0.4894 |
| BF  100ms before IC  average value | A | 42.36±15.57 | A | B | 0.3855 | BF  100ms after IC  average value | A | 17.37±5.77 | A | B | 0.1790 |
| B | 47.23±15.90 | A | C | 0.3406 | B | 20.05±5.42 | A | C | 0.6388 |
| C | 37.01±20.09 | A | D | 0.7263 | C | 18.30±7.00 | A | D | 0.9803 |
| D | 40.40±20.23 | B | C | 0.0708 | D | 17.32±7.25 | B | C | 0.3790 |
|  |  | B | D | 0.2245 |  |  | B | D | 0.1713 |
| C | D | 0.5453 | C | D | 0.6213 |
| Interaction | | | 0.8517 | Interaction | | | 0.1942 |
| Test limb | | | 0.2984 | Test limb | | | 0.5450 |
| Subject group | | | 0.1267 | Subject group | | | 0.5220 |
| ST  100ms before IC  peak value | A | 63.23±19.99 | A | B | 0.4372 | ST  100ms after IC  peak value | A | 31.33±11.44 | A | B | 0.1626 |
| B | 58.20±18.37 | A | C | 0.0439 | B | 26.72±10.56 | A | C | 0.6413 |
| C | 50.04±23.95 | A | D | 0.0229 | C | 29.80±10.78 | A | D | 0.1334 |
| D | 48.29±20.79 | B | C | 0.2090 | D | 26.37±9.53 | B | C | 0.3491 |
|  |  | B | D | 0.1279 |  |  | B | D | 0.9151 |
| C | D | 0.7865 | C | D | 0.2974 |
| Interaction | | | 0.7198 | Interaction | | | 0.7994 |
| Test limb | | | 0.4589 | Test limb | | | 0.0860 |
| Subject group | | | 0.0132(F=6.429) | Subject group | | | 0.6856 |
| ST  100ms before IC  average value | A | 46.01±15.19 | A | B | 0.8788 | ST  100ms after IC  average value | A | 23.01±6.69 | A | B | 0.4667 |
| B | 45.23±15.40 | A | C | 0.0483 | B | 21.23±9.67 | A | C | 0.0976 |
| C | 35.81±16.25 | A | D | 0.1421 | C | 18.93±8.33 | A | D | 0.1817 |
| D | 38.47±18.82 | B | C | 0.0676 | D | 19.73±6.40 | B | C | 0.3475 |
|  |  | B | D | 0.1874 |  |  | B | D | 0.5396 |
| C | D | 0.6023 | C | D | 0.7431 |
| Interaction | | | 0.6338 | Interaction | | | 0.4556 |
| Test limb | | | 0.7942 | Test limb | | | 0.7768 |
| Subject group | | | 0.0208(F=5.563) | Subject group | | | 0.1090 |
| Gmax  100ms before IC  peak value | A | 23.94±8.26 | A | B | 0.1609 | Gmax  100ms after IC  peak value | A | 45.64±13.79 | A | B | 0.2754 |
| B | 20.26±8.63 | A | C | 0.3979 | B | 51.75±10.21 | A | C | 0.0003 |
| C | 21.73±7.81 | A | D | 0.5890 | C | 63.13±17.85 | A | D | 0.0122 |
| D | 25.35±8.96 | B | C | 0.5734 | D | 57.41±16.46 | B | C | 0.0081 |
|  |  | B | D | 0.0537 |  |  | B | D | 0.1461 |
| C | D | 0.1677 | C | D | 0.2162 |
| Interaction | | | 0.0505 | Interaction | | | 0.1012 |
| Test limb | | | 0.9871 | Test limb | | | 0.9168 |
| Subject group | | | 0.4358 | Subject group | | | 0.0004 (F = 13.94) |
| Gmax  100ms before IC  average value | A | 16.74±5.40 | A | B | 0.1700 | Gmax  100ms after IC  average value | A | 27.26±9.63 | A | B | 0.4788 |
| B | 14.26±4.78 | A | C | 0.9603 | B | 30.23±9.57 | A | C | 0.0627 |
| C | 16.83±6.20 | A | D | 0.7770 | C | 35.14±17.16 | A | D | 0.1665 |
| D | 17.25±6.66 | B | C | 0.1553 | D | 33.09±15.92 | B | C | 0.2432 |
|  |  | B | D | 0.0990 |  |  | B | D | 0.4956 |
| C | D | 0.8154 | C | D | 0.6246 |
| Interaction | | | 0.2557 | Interaction | | | 0.3976 |
| Test limb | | | 0.4183 | Test limb | | | 0.8765 |
| Subject group | | | 0.2278 | Subject group | | | 0.0727 |

Note: A, indicates dominant leg (affected limb) in the injury group; B, indicates non-dominant leg (healthy limbs) in the injury group; C, indicates dominant leg in the control group; D, indicates non-dominant leg in the control group; Bolded p-values indicate significant differences between the two groups (p < 0.05)
